# Supplementary material
Source: ML conference proceedings conference paper supplement (https://www.ecva.net/papers/eccv_2020/papers_ECCV/html/123680171_ECCV_2020_paper.php)
Supplement: Supplementary file 1 [file 123680171-supp.pdf]

# SACA Net: Cybersickness Assessment of Individual Viewers for VR Content via Graph-based Symptom Relation Embedding - *Supplementary Material* -

## 1 Network Details

**Table 1.** Network details of the visual expectation generator in the sensory mismatch detector of the stimulus symptom context guider.

| Visual Expectation Generator |                          |                                          |
|------------------------------|--------------------------|------------------------------------------|
| Layer                        | Filter/<br>Stride        | Output Size<br>( $h \times w \times c$ ) |
| ConvLSTM1                    | $3 \times 3 /$<br>(2, 2) | $112 \times 112 \times 16$               |
| ConvLSTM2                    | $3 \times 3 /$<br>(2, 2) | $56 \times 56 \times 32$                 |
| ConvLSTM3                    | $3 \times 3 /$<br>(2, 2) | $28 \times 28 \times 64$                 |
| ConvLSTM4                    | $3 \times 3 /$<br>(2, 2) | $14 \times 14 \times 128$                |
| DeConvLSTM1                  | $3 \times 3 /$<br>(2, 2) | $28 \times 28 \times 64$                 |
| DeConvLSTM2                  | $3 \times 3 /$<br>(2, 2) | $56 \times 56 \times 32$                 |
| DeConvLSTM3                  | $3 \times 3 /$<br>(2, 2) | $112 \times 112 \times 16$               |
| DeConvLSTM4                  | $3 \times 3 /$<br>(2, 2) | $224 \times 224 \times 3$                |

**Table 2.** Network details of the mismatch encoder and the visual encoder in the stimulus symptom context guider. The mismatch encoder and the visual encoder have the same network structure but do not share their weights.

| Mismatch Encoder / Visual Encoder |                                      |                                                   |
|-----------------------------------|--------------------------------------|---------------------------------------------------|
| Layer                             | Filter/<br>Stride                    | Output Size<br>( $l \times h \times w \times c$ ) |
| 3D-Conv1                          | $3 \times 3 \times 3 /$<br>(1, 2, 2) | $9 \times 112 \times 112 \times 8$                |
| 3D-Conv2                          | $3 \times 3 \times 3 /$<br>(1, 2, 2) | $7 \times 56 \times 56 \times 16$                 |
| 3D-Conv3                          | $3 \times 3 \times 3 /$<br>(1, 2, 2) | $5 \times 28 \times 28 \times 32$                 |
| 3D-Conv4                          | $3 \times 3 \times 3 /$<br>(1, 2, 2) | $3 \times 14 \times 14 \times 64$                 |
| 3D-Conv5                          | $3 \times 3 \times 3 /$<br>(1, 2, 2) | $1 \times 7 \times 7 \times 64$                   |

**Table 3.** Network details of the global context encoder and the symptom group feature extraction in the stimulus symptom context guider. From FC2, it is applied individually for each symptom group. The feature after FC3 indicates the symptom group feature.

| Global Context Encoder / Symptom Group Feature Extraction |                       |                                          |
|-----------------------------------------------------------|-----------------------|------------------------------------------|
| Layer                                                     | Filter/<br>Stride     | Output Size<br>( $h \times w \times c$ ) |
| 2D-Conv                                                   | $3 \times 3 / (1, 1)$ | $7 \times 7 \times 256$                  |
| FC1                                                       | $64 / (-)$            | $1 \times 1 \times 64$                   |
| FC2                                                       | $32 / (-)$            | $1 \times 1 \times 32$                   |
| FC3                                                       | $32 / (-)$            | $1 \times 1 \times 32$                   |
| FC4                                                       | $1 / (-)$             | $1 \times 1 \times 1$                    |

**Table 4.** Network details of the time-wise encoder, the frequency band attention, the time-freq-wise encoder, and the symptom feature extraction in the physiological symptom guider. From FC4.2, it is applied individually for each symptom. The feature after FC4.3 indicates the symptom feature.

| Time-wise Encoder/Frequency Band Attention<br>/Time-Freq-wise Encoder/Symptom Feature Extraction |                       |                                          |
|--------------------------------------------------------------------------------------------------|-----------------------|------------------------------------------|
| Layer                                                                                            | Filter/<br>Stride     | Output Size<br>( $h \times w \times c$ ) |
| 1D-Conv1.1                                                                                       | $1 \times 3 / (1, 1)$ | $48 \times 128 \times 32$                |
| 1D-Conv1.2                                                                                       | $1 \times 3 / (1, 1)$ | $48 \times 128 \times 32$                |
| 1D-Conv1.3                                                                                       | $1 \times 3 / (1, 2)$ | $48 \times 64 \times 32$                 |
| 2D-Conv2.1                                                                                       | $3 \times 3 / (2, 2)$ | $24 \times 32 \times 16$                 |
| 2D-Conv2.2                                                                                       | $3 \times 3 / (2, 2)$ | $12 \times 16 \times 8$                  |
| 2D-Conv2.3                                                                                       | $3 \times 3 / (2, 2)$ | $6 \times 8 \times 1$                    |
| FC2.1                                                                                            | $5 / (-)$             | $1 \times 1 \times 5$                    |
| 2D-Conv3.1                                                                                       | $3 \times 3 / (1, 1)$ | $48 \times 64 \times 32$                 |
| 2D-Conv3.2                                                                                       | $3 \times 3 / (2, 1)$ | $24 \times 64 \times 32$                 |
| 2D-Conv3.3                                                                                       | $3 \times 3 / (2, 2)$ | $12 \times 32 \times 32$                 |
| 2D-Conv4.1                                                                                       | $3 \times 3 / (1, 1)$ | $12 \times 8 \times 32$                  |
| 2D-Conv4.2                                                                                       | $3 \times 3 / (2, 2)$ | $6 \times 4 \times 32$                   |
| FC4.1                                                                                            | $256 / (-)$           | $1 \times 1 \times 256$                  |
| FC4.2                                                                                            | $16 / (-)$            | $1 \times 1 \times 16$                   |
| FC4.3                                                                                            | $16 / (-)$            | $1 \times 1 \times 16$                   |
| FC4.4                                                                                            | $4 / (-)$             | $1 \times 1 \times 4$                    |
| FC4.5                                                                                            | $1 / (-)$             | $1 \times 1 \times 1$                    |

## 2 Network Computational Cost

**Table 5.** Weight parameter size and inference time for the proposed network. The inference time is checked based on a single TITAN XP GPU.

| Model                           | # of Weights | Inference Time (sec) |
|---------------------------------|--------------|----------------------|
| Stimulus Symptom Context Guider | 3.03M        | 1.646                |
| Physiological Symptom Guider    | 0.16M        | 0.057                |
| Symptom Relation Embedder       | 0.04M        | 0.016                |
| <b>Total</b>                    | <b>3.23M</b> | <b>1.719</b>         |

## 3 Additional Quantitative Results

**Table 6.** Total SSQ score prediction performances according to the mismatch feature from the sensory mismatch detector in the stimulus symptom context guider.

| VRSA DB-Shaking                                  |              |              |               | VRSA DB-FR                                       |              |              |               |
|--------------------------------------------------|--------------|--------------|---------------|--------------------------------------------------|--------------|--------------|---------------|
| Method                                           | PLCC         | SROCC        | RMSE          | Method                                           | PLCC         | SROCC        | RMSE          |
| Proposed Method<br>(w/o Mismatch Features)       | 0.725        | 0.606        | 30.069        | Proposed Method<br>(w/o Mismatch Feature)        | 0.777        | 0.640        | 24.992        |
| <b>Proposed Method<br/>(w/ Mismatch Feature)</b> | <b>0.751</b> | <b>0.679</b> | <b>25.373</b> | <b>Proposed Method<br/>(w/ Mismatch Feature)</b> | <b>0.801</b> | <b>0.671</b> | <b>22.937</b> |

**Table 7.** Total SSQ score prediction performances according to Relational Embedding (RE) and Stimulus Context (ST).

| VRSA DB-Shaking                           |              |              |               | VRSA DB-FR                                |              |              |               |
|-------------------------------------------|--------------|--------------|---------------|-------------------------------------------|--------------|--------------|---------------|
| Method                                    | PLCC         | SROCC        | RMSE          | Method                                    | PLCC         | SROCC        | RMSE          |
| Proposed Method<br>(w/o RE, w/o ST)       | 0.610        | 0.461        | 35.070        | Proposed Method<br>(w/o RE, w/o ST)       | 0.745        | 0.599        | 25.611        |
| Proposed Method<br>(w/ RE, w/o ST)        | 0.677        | 0.544        | 32.961        | Proposed Method<br>(w/ RE, w/o ST)        | 0.768        | 0.619        | 24.631        |
| <b>Proposed Method<br/>(w/ RE, w/ ST)</b> | <b>0.751</b> | <b>0.679</b> | <b>25.373</b> | <b>Proposed Method<br/>(w/ RE, w/ ST)</b> | <b>0.801</b> | <b>0.671</b> | <b>22.937</b> |

## 4 Learning Curves

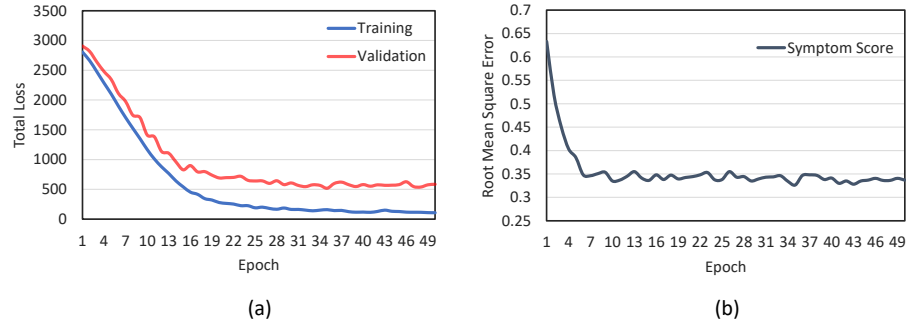

**Fig. 1.** (a) Total loss for training and validation according to the learning epoch. (b) Root mean square error (RMSE) validation for symptom score according to the learning epoch. Both results are from one training fold on VRSA DB-FR.
